# Supplementary material
Source: publisher figshare collection journal article supplement (https://acs.figshare.com/ndownloader/files/4666366)
Supplement: Supplementary file 1 [file 4666366]

data_bjf189

 

_audit_creation_method            SHELXL-97

_chemical_name_systematic

;

 ?

;

_chemical_name_common             ?

_chemical_melting_point           ?

_chemical_formula_moiety          ?

_chemical_formula_sum

 'C56 H64 Cl6 N6 O6 P2 Pd'

_chemical_formula_weight          1298.17

 

loop_

 _atom_type_symbol

 _atom_type_description

 _atom_type_scat_dispersion_real

 _atom_type_scat_dispersion_imag

 _atom_type_scat_source

 'C'  'C'   0.0033   0.0016

 'International Tables Vol C Tables 4.2.6.8 and 6.1.1.4'

 'H'  'H'   0.0000   0.0000

 'International Tables Vol C Tables 4.2.6.8 and 6.1.1.4'

 'N'  'N'   0.0061   0.0033

 'International Tables Vol C Tables 4.2.6.8 and 6.1.1.4'

 'O'  'O'   0.0106   0.0060

 'International Tables Vol C Tables 4.2.6.8 and 6.1.1.4'

 'P'  'P'   0.1023   0.0942

 'International Tables Vol C Tables 4.2.6.8 and 6.1.1.4'

 'Cl'  'Cl'   0.1484   0.1585

 'International Tables Vol C Tables 4.2.6.8 and 6.1.1.4'

 'Pd'  'Pd'  -0.9988   1.0072

 'International Tables Vol C Tables 4.2.6.8 and 6.1.1.4'

 

_symmetry_cell_setting            Monoclinic

_symmetry_space_group_name_H-M    P2(1)/c

 

loop_

 _symmetry_equiv_pos_as_xyz

 'x, y, z'

 '-x, y+1/2, -z+1/2'

 '-x, -y, -z'

 'x, -y-1/2, z-1/2'

 

_cell_length_a                    14.7270(3)

_cell_length_b                    22.0291(4)

_cell_length_c                    8.75330(10)

_cell_angle_alpha                 90.00

_cell_angle_beta                  98.8130(10)

_cell_angle_gamma                 90.00

_cell_volume                      2806.24(8)

_cell_formula_units_Z             2

_cell_measurement_temperature     100(2)

_cell_measurement_reflns_used     ?

_cell_measurement_theta_min       ?

_cell_measurement_theta_max       ?

 

_exptl_crystal_description        Plate

_exptl_crystal_colour             'clear pale yellow'

_exptl_crystal_size_max           0.23

_exptl_crystal_size_mid           0.14

_exptl_crystal_size_min           0.05

_exptl_crystal_density_meas       0

_exptl_crystal_density_diffrn     1.536

_exptl_crystal_density_method     'not measured'

_exptl_crystal_F_000              1336

_exptl_absorpt_coefficient_mu     0.730

_exptl_absorpt_correction_type    multi-scan

_exptl_absorpt_correction_T_min   0.8530

_exptl_absorpt_correction_T_max   0.9616

_exptl_absorpt_process_details    ?

 

_exptl_special_details

;

 ?

;

 

_diffrn_ambient_temperature       100(2)

_diffrn_radiation_wavelength      0.71073

_diffrn_radiation_type            MoK\a

_diffrn_radiation_source          'fine-focus sealed tube'

_diffrn_radiation_monochromator   graphite

_diffrn_measurement_device_type   'Bruker P4'

_diffrn_measurement_method        '\w scans'

_diffrn_detector_area_resol_mean  ?

_diffrn_standards_number          ?

_diffrn_standards_interval_count  ?

_diffrn_standards_interval_time   ?

_diffrn_standards_decay_%         ?

_diffrn_reflns_number             28103

_diffrn_reflns_av_R_equivalents   0.0727

_diffrn_reflns_av_sigmaI/netI     0.0683

_diffrn_reflns_limit_h_min        -19

_diffrn_reflns_limit_h_max        19

_diffrn_reflns_limit_k_min        -28

_diffrn_reflns_limit_k_max        26

_diffrn_reflns_limit_l_min        -10

_diffrn_reflns_limit_l_max        11

_diffrn_reflns_theta_min          1.68

_diffrn_reflns_theta_max          27.50

_reflns_number_total              6452

_reflns_number_gt                 4281

_reflns_threshold_expression      >2sigma(I)

 

_computing_data_collection        'Bruker XSCANS'

_computing_cell_refinement        'Bruker XSCANS'

_computing_data_reduction         'Bruker SHELXTL'

_computing_structure_solution     'SHELXS-97 (Sheldrick, 1990)'

_computing_structure_refinement   'SHELXL-97 (Sheldrick, 1997)'

_computing_molecular_graphics     'Bruker SHELXTL'

_computing_publication_material   'Bruker SHELXTL'

 

_refine_special_details

;

 Refinement of F^2^ against ALL reflections.  The weighted R-factor wR and

 goodness of fit S are based on F^2^, conventional R-factors R are based

 on F, with F set to zero for negative F^2^. The threshold expression of

 F^2^ > 2sigma(F^2^) is used only for calculating R-factors(gt) etc. and is

 not relevant to the choice of reflections for refinement.  R-factors based

 on F^2^ are statistically about twice as large as those based on F, and R-

 factors based on ALL data will be even larger.

;

 

_refine_ls_structure_factor_coef  Fsqd

_refine_ls_matrix_type            full

_refine_ls_weighting_scheme       calc

_refine_ls_weighting_details

 'calc w=1/[\s^2^(Fo^2^)+(0.0638P)^2^+0.0000P] where P=(Fo^2^+2Fc^2^)/3'

_atom_sites_solution_primary      direct

_atom_sites_solution_secondary    difmap

_atom_sites_solution_hydrogens    geom

_refine_ls_hydrogen_treatment     constr

_refine_ls_extinction_method      none

_refine_ls_extinction_coef        ?

_refine_ls_number_reflns          6452

_refine_ls_number_parameters      349

_refine_ls_number_restraints      0

_refine_ls_R_factor_all           0.0902

_refine_ls_R_factor_gt            0.0479

_refine_ls_wR_factor_ref          0.1248

_refine_ls_wR_factor_gt           0.1126

_refine_ls_goodness_of_fit_ref    1.034

_refine_ls_restrained_S_all       1.034

_refine_ls_shift/su_max           0.000

_refine_ls_shift/su_mean          0.000

 

loop_

 _atom_site_label

 _atom_site_type_symbol

 _atom_site_fract_x

 _atom_site_fract_y

 _atom_site_fract_z

 _atom_site_U_iso_or_equiv

 _atom_site_adp_type

 _atom_site_occupancy

 _atom_site_symmetry_multiplicity

 _atom_site_calc_flag

 _atom_site_refinement_flags

 _atom_site_disorder_assembly

 _atom_site_disorder_group

Pd1 Pd 0.5000 0.5000 0.5000 0.01367(11) Uani 1 2 d S . .

P1 P 0.43771(6) 0.57208(4) 0.32492(10) 0.0143(2) Uani 1 1 d . . .

Cl1 Cl 0.42154(7) 0.42818(4) 0.34101(10) 0.0229(2) Uani 1 1 d . . .

Cl1S Cl 0.00342(10) 0.84929(6) 0.22650(17) 0.0599(4) Uani 1 1 d . . .

Cl2S Cl -0.08859(11) 0.96058(7) 0.2791(2) 0.0732(5) Uani 1 1 d . . .

O1 O 0.17565(18) 0.40623(11) -0.3392(3) 0.0248(6) Uani 1 1 d . . .

N2 N 0.4165(2) 0.69090(12) 0.2332(3) 0.0141(6) Uani 1 1 d . . .

N3 N 0.2849(2) 0.62132(12) 0.1502(3) 0.0134(6) Uani 1 1 d . . .

N1 N 0.42488(19) 0.61500(12) 0.0270(3) 0.0126(6) Uani 1 1 d . . .

O3 O 0.11806(18) 0.88224(11) -0.0753(3) 0.0244(6) Uani 1 1 d . . .

C1 C 0.4688(2) 0.56704(14) 0.1299(4) 0.0129(7) Uani 1 1 d . . .

H1A H 0.5363 0.5703 0.1369 0.015 Uiso 1 1 calc R . .

H1B H 0.4500 0.5269 0.0850 0.015 Uiso 1 1 calc R . .

O2 O 0.82689(18) 0.73726(12) 0.1097(3) 0.0255(6) Uani 1 1 d . . .

C14 C 0.5510(2) 0.69083(15) 0.0911(4) 0.0153(7) Uani 1 1 d . . .

C21 C 0.2639(2) 0.73306(15) 0.1238(4) 0.0147(7) Uani 1 1 d . . .

C10 C 0.2163(3) 0.45515(15) -0.2591(4) 0.0189(8) Uani 1 1 d . . .

C18 C 0.6799(3) 0.75695(16) 0.1692(4) 0.0213(8) Uani 1 1 d . . .

H18A H 0.7043 0.7929 0.2195 0.026 Uiso 1 1 calc R . .

C5 C 0.4496(2) 0.67725(14) 0.0852(4) 0.0145(7) Uani 1 1 d . . .

H5A H 0.4163 0.7058 0.0072 0.017 Uiso 1 1 calc R . .

C3 C 0.3125(2) 0.57352(15) 0.2679(4) 0.0156(7) Uani 1 1 d . . .

H3A H 0.2913 0.5335 0.2252 0.019 Uiso 1 1 calc R . .

H3B H 0.2828 0.5814 0.3600 0.019 Uiso 1 1 calc R . .

C19 C 0.5895(3) 0.74228(16) 0.1694(4) 0.0182(8) Uani 1 1 d . . .

H19A H 0.5525 0.7673 0.2233 0.022 Uiso 1 1 calc R . .

C4 C 0.3240(2) 0.61147(15) 0.0052(4) 0.0136(7) Uani 1 1 d . . .

H4A H 0.3016 0.6462 -0.0639 0.016 Uiso 1 1 calc R . .

C12 C 0.3348(2) 0.52945(15) -0.1911(4) 0.0153(7) Uani 1 1 d . . .

H12A H 0.3926 0.5459 -0.2051 0.018 Uiso 1 1 calc R . .

C24 C 0.1624(3) 0.83089(16) -0.0145(4) 0.0189(8) Uani 1 1 d . . .

C11 C 0.2996(2) 0.48030(15) -0.2813(4) 0.0155(7) Uani 1 1 d . . .

H11A H 0.3324 0.4641 -0.3574 0.019 Uiso 1 1 calc R . .

C16 C 0.7001(3) 0.66919(16) 0.0177(4) 0.0188(8) Uani 1 1 d . . .

H16A H 0.7381 0.6437 -0.0332 0.023 Uiso 1 1 calc R . .

C22 C 0.2924(3) 0.79246(15) 0.1581(4) 0.0176(8) Uani 1 1 d . . .

H22A H 0.3476 0.7997 0.2273 0.021 Uiso 1 1 calc R . .

C6 C 0.3155(2) 0.68159(15) 0.2144(4) 0.0148(7) Uani 1 1 d . . .

H6A H 0.2985 0.6833 0.3207 0.018 Uiso 1 1 calc R . .

C8 C 0.2026(2) 0.52989(16) -0.0635(4) 0.0188(8) Uani 1 1 d . . .

H8A H 0.1681 0.5470 0.0091 0.023 Uiso 1 1 calc R . .

C17 C 0.7360(2) 0.71996(16) 0.0967(4) 0.0181(8) Uani 1 1 d . . .

C7 C 0.2873(2) 0.55512(15) -0.0805(4) 0.0147(7) Uani 1 1 d . . .

C2 C 0.4625(2) 0.65348(14) 0.3622(4) 0.0144(7) Uani 1 1 d . . .

H2A H 0.4408 0.6657 0.4594 0.017 Uiso 1 1 calc R . .

H2B H 0.5296 0.6603 0.3749 0.017 Uiso 1 1 calc R . .

C25 C 0.1338(2) 0.77219(16) -0.0500(4) 0.0189(8) Uani 1 1 d . . .

H25A H 0.0798 0.7649 -0.1220 0.023 Uiso 1 1 calc R . .

C9 C 0.1679(3) 0.48044(16) -0.1502(4) 0.0203(8) Uani 1 1 d . . .

H9A H 0.1106 0.4635 -0.1354 0.024 Uiso 1 1 calc R . .

C23 C 0.2408(3) 0.84108(16) 0.0924(4) 0.0186(8) Uani 1 1 d . . .

H23A H 0.2592 0.8814 0.1204 0.022 Uiso 1 1 calc R . .

C26 C 0.1843(3) 0.72379(16) 0.0200(4) 0.0184(8) Uani 1 1 d . . .

H26A H 0.1638 0.6835 -0.0037 0.022 Uiso 1 1 calc R . .

C15 C 0.6072(2) 0.65564(16) 0.0135(4) 0.0170(8) Uani 1 1 d . . .

H15A H 0.5819 0.6214 -0.0440 0.020 Uiso 1 1 calc R . .

C13 C 0.2309(3) 0.37395(17) -0.4346(5) 0.0278(9) Uani 1 1 d . . .

H13A H 0.1954 0.3401 -0.4860 0.042 Uiso 1 1 calc R . .

H13B H 0.2862 0.3583 -0.3702 0.042 Uiso 1 1 calc R . .

H13C H 0.2487 0.4016 -0.5127 0.042 Uiso 1 1 calc R . .

C20 C 0.8837(3) 0.70505(19) 0.0206(5) 0.0296(9) Uani 1 1 d . . .

H20A H 0.9462 0.7216 0.0405 0.044 Uiso 1 1 calc R . .

H20B H 0.8592 0.7093 -0.0894 0.044 Uiso 1 1 calc R . .

H20C H 0.8851 0.6620 0.0493 0.044 Uiso 1 1 calc R . .

C27 C 0.0474(3) 0.87294(19) -0.2019(5) 0.0323(10) Uani 1 1 d . . .

H27A H 0.0202 0.9121 -0.2368 0.048 Uiso 1 1 calc R . .

H27B H 0.0000 0.8467 -0.1700 0.048 Uiso 1 1 calc R . .

H27C H 0.0731 0.8536 -0.2866 0.048 Uiso 1 1 calc R . .

C1S C -0.0179(3) 0.92331(19) 0.1638(5) 0.0378(11) Uani 1 1 d . . .

H1SA H -0.0483 0.9231 0.0548 0.045 Uiso 1 1 calc R . .

H1SB H 0.0410 0.9455 0.1691 0.045 Uiso 1 1 calc R . .

 

loop_

 _atom_site_aniso_label

 _atom_site_aniso_U_11

 _atom_site_aniso_U_22

 _atom_site_aniso_U_33

 _atom_site_aniso_U_23

 _atom_site_aniso_U_13

 _atom_site_aniso_U_12

Pd1 0.0162(2) 0.01499(18) 0.00933(17) 0.00123(15) 0.00053(14) 0.00026(17)

P1 0.0160(5) 0.0155(5) 0.0110(4) 0.0013(3) 0.0003(4) 0.0010(4)

Cl1 0.0308(6) 0.0190(5) 0.0165(5) -0.0012(3) -0.0042(4) -0.0037(4)

Cl1S 0.0657(10) 0.0468(7) 0.0755(10) 0.0219(7) 0.0367(8) 0.0177(7)

Cl2S 0.0752(11) 0.0532(9) 0.1005(12) -0.0278(8) 0.0432(10) 0.0023(8)

O1 0.0206(15) 0.0249(14) 0.0285(15) -0.0084(11) 0.0021(12) -0.0029(11)

N2 0.0139(16) 0.0177(15) 0.0110(14) 0.0019(11) 0.0032(12) 0.0014(12)

N3 0.0171(16) 0.0125(14) 0.0110(14) 0.0013(11) 0.0035(12) 0.0009(12)

N1 0.0123(15) 0.0139(14) 0.0111(14) 0.0011(11) 0.0004(12) 0.0001(12)

O3 0.0251(16) 0.0215(14) 0.0245(14) 0.0033(11) -0.0026(12) 0.0065(11)

C1 0.0134(18) 0.0140(16) 0.0109(16) 0.0005(12) 0.0009(14) 0.0014(13)

O2 0.0160(14) 0.0296(15) 0.0305(15) 0.0009(12) 0.0030(12) -0.0059(11)

C14 0.0162(19) 0.0148(17) 0.0137(17) 0.0048(13) -0.0012(14) -0.0022(14)

C21 0.0146(18) 0.0195(18) 0.0109(16) 0.0012(13) 0.0049(14) 0.0034(14)

C10 0.019(2) 0.0167(17) 0.0188(18) -0.0003(14) -0.0026(15) -0.0002(15)

C18 0.028(2) 0.0194(19) 0.0153(18) 0.0003(14) 0.0001(16) -0.0046(16)

C5 0.0171(19) 0.0117(16) 0.0143(17) -0.0010(13) 0.0017(15) 0.0010(14)

C3 0.0159(19) 0.0171(18) 0.0138(17) 0.0007(13) 0.0027(15) 0.0023(14)

C19 0.020(2) 0.0213(19) 0.0142(18) 0.0015(14) 0.0046(15) 0.0014(15)

C4 0.0125(18) 0.0153(16) 0.0126(16) 0.0008(13) 0.0010(14) 0.0019(14)

C12 0.0111(18) 0.0202(18) 0.0137(17) 0.0027(14) -0.0011(14) -0.0017(14)

C24 0.018(2) 0.0195(18) 0.0195(19) 0.0031(14) 0.0045(16) 0.0071(15)

C11 0.0158(19) 0.0161(16) 0.0140(17) -0.0016(13) 0.0004(15) 0.0034(14)

C16 0.019(2) 0.0214(19) 0.0172(18) 0.0025(14) 0.0061(15) 0.0010(15)

C22 0.020(2) 0.0206(18) 0.0124(17) -0.0029(14) 0.0023(15) -0.0009(15)

C6 0.0170(19) 0.0168(17) 0.0101(16) 0.0002(13) 0.0005(14) -0.0010(14)

C8 0.0137(19) 0.024(2) 0.0179(18) -0.0001(15) 0.0015(15) 0.0007(15)

C17 0.0120(18) 0.0260(19) 0.0158(18) 0.0085(14) 0.0007(15) -0.0020(15)

C7 0.0142(18) 0.0148(17) 0.0137(17) 0.0018(13) -0.0018(14) 0.0030(14)

C2 0.0154(18) 0.0162(17) 0.0116(16) 0.0002(13) 0.0025(14) 0.0021(14)

C25 0.0134(19) 0.0238(19) 0.0190(19) -0.0022(15) 0.0006(15) 0.0013(15)

C9 0.0152(19) 0.0218(18) 0.023(2) -0.0002(15) 0.0012(16) -0.0035(15)

C23 0.024(2) 0.0187(18) 0.0137(17) -0.0012(14) 0.0056(15) 0.0013(15)

C26 0.018(2) 0.0159(17) 0.0217(19) -0.0022(14) 0.0033(16) 0.0010(15)

C15 0.019(2) 0.0169(18) 0.0144(17) -0.0014(13) 0.0012(15) -0.0024(15)

C13 0.029(2) 0.022(2) 0.031(2) -0.0062(17) 0.0021(19) -0.0033(17)

C20 0.018(2) 0.036(2) 0.035(2) 0.0047(19) 0.0059(18) 0.0030(18)

C27 0.026(2) 0.035(2) 0.033(2) 0.0056(19) -0.0078(19) 0.0094(19)

C1S 0.042(3) 0.036(3) 0.037(3) -0.006(2) 0.012(2) -0.001(2)

 

_geom_special_details

;

 All esds (except the esd in the dihedral angle between two l.s. planes)

 are estimated using the full covariance matrix.  The cell esds are taken

 into account individually in the estimation of esds in distances, angles

 and torsion angles; correlations between esds in cell parameters are only

 used when they are defined by crystal symmetry.  An approximate (isotropic)

 treatment of cell esds is used for estimating esds involving l.s. planes.

;

 

loop_

 _geom_bond_atom_site_label_1

 _geom_bond_atom_site_label_2

 _geom_bond_distance

 _geom_bond_site_symmetry_2

 _geom_bond_publ_flag

Pd1 P1 2.2980(9) . ?

Pd1 P1 2.2980(9) 3_666 ?

Pd1 Cl1 2.2983(9) . ?

Pd1 Cl1 2.2983(9) 3_666 ?

P1 C3 1.835(4) . ?

P1 C1 1.837(3) . ?

P1 C2 1.849(3) . ?

Cl1S C1S 1.734(4) . ?

Cl2S C1S 1.760(4) . ?

O1 C10 1.372(4) . ?

O1 C13 1.440(4) . ?

N2 C2 1.476(4) . ?

N2 C5 1.484(4) . ?

N2 C6 1.484(4) . ?

N3 C6 1.485(4) . ?

N3 C3 1.485(4) . ?

N3 C4 1.488(4) . ?

N1 C4 1.471(4) . ?

N1 C1 1.472(4) . ?

N1 C5 1.489(4) . ?

O3 C24 1.372(4) . ?

O3 C27 1.414(5) . ?

C1 H1A 0.9900 . ?

C1 H1B 0.9900 . ?

O2 C17 1.379(4) . ?

O2 C20 1.419(5) . ?

C14 C15 1.386(5) . ?

C14 C19 1.399(5) . ?

C14 C5 1.516(5) . ?

C21 C26 1.384(5) . ?

C21 C22 1.393(5) . ?

C21 C6 1.520(5) . ?

C10 C11 1.387(5) . ?

C10 C9 1.390(5) . ?

C18 C19 1.371(5) . ?

C18 C17 1.383(5) . ?

C18 H18A 0.9500 . ?

C5 H5A 1.0000 . ?

C3 H3A 0.9900 . ?

C3 H3B 0.9900 . ?

C19 H19A 0.9500 . ?

C4 C7 1.507(5) . ?

C4 H4A 1.0000 . ?

C12 C11 1.393(5) . ?

C12 C7 1.398(5) . ?

C12 H12A 0.9500 . ?

C24 C25 1.380(5) . ?

C24 C23 1.389(5) . ?

C11 H11A 0.9500 . ?

C16 C17 1.377(5) . ?

C16 C15 1.394(5) . ?

C16 H16A 0.9500 . ?

C22 C23 1.386(5) . ?

C22 H22A 0.9500 . ?

C6 H6A 1.0000 . ?

C8 C9 1.380(5) . ?

C8 C7 1.395(5) . ?

C8 H8A 0.9500 . ?

C2 H2A 0.9900 . ?

C2 H2B 0.9900 . ?

C25 C26 1.387(5) . ?

C25 H25A 0.9500 . ?

C9 H9A 0.9500 . ?

C23 H23A 0.9500 . ?

C26 H26A 0.9500 . ?

C15 H15A 0.9500 . ?

C13 H13A 0.9800 . ?

C13 H13B 0.9800 . ?

C13 H13C 0.9800 . ?

C20 H20A 0.9800 . ?

C20 H20B 0.9800 . ?

C20 H20C 0.9800 . ?

C27 H27A 0.9800 . ?

C27 H27B 0.9800 . ?

C27 H27C 0.9800 . ?

C1S H1SA 0.9900 . ?

C1S H1SB 0.9900 . ?

 

loop_

 _geom_angle_atom_site_label_1

 _geom_angle_atom_site_label_2

 _geom_angle_atom_site_label_3

 _geom_angle

 _geom_angle_site_symmetry_1

 _geom_angle_site_symmetry_3

 _geom_angle_publ_flag

P1 Pd1 P1 180.00(3) . 3_666 ?

P1 Pd1 Cl1 87.68(3) . . ?

P1 Pd1 Cl1 92.32(3) 3_666 . ?

P1 Pd1 Cl1 92.32(3) . 3_666 ?

P1 Pd1 Cl1 87.68(3) 3_666 3_666 ?

Cl1 Pd1 Cl1 180.00(3) . 3_666 ?

C3 P1 C1 97.54(16) . . ?

C3 P1 C2 101.19(16) . . ?

C1 P1 C2 98.76(15) . . ?

C3 P1 Pd1 118.37(11) . . ?

C1 P1 Pd1 116.56(11) . . ?

C2 P1 Pd1 120.30(11) . . ?

C10 O1 C13 116.3(3) . . ?

C2 N2 C5 112.4(3) . . ?

C2 N2 C6 110.0(2) . . ?

C5 N2 C6 109.4(3) . . ?

C6 N3 C3 109.7(3) . . ?

C6 N3 C4 108.6(2) . . ?

C3 N3 C4 112.8(3) . . ?

C4 N1 C1 112.5(3) . . ?

C4 N1 C5 106.4(2) . . ?

C1 N1 C5 113.0(3) . . ?

C24 O3 C27 115.7(3) . . ?

N1 C1 P1 112.1(2) . . ?

N1 C1 H1A 109.2 . . ?

P1 C1 H1A 109.2 . . ?

N1 C1 H1B 109.2 . . ?

P1 C1 H1B 109.2 . . ?

H1A C1 H1B 107.9 . . ?

C17 O2 C20 117.6(3) . . ?

C15 C14 C19 117.7(3) . . ?

C15 C14 C5 122.2(3) . . ?

C19 C14 C5 120.0(3) . . ?

C26 C21 C22 118.5(3) . . ?

C26 C21 C6 122.6(3) . . ?

C22 C21 C6 118.6(3) . . ?

O1 C10 C11 124.6(3) . . ?

O1 C10 C9 115.9(3) . . ?

C11 C10 C9 119.5(3) . . ?

C19 C18 C17 120.7(3) . . ?

C19 C18 H18A 119.6 . . ?

C17 C18 H18A 119.6 . . ?

N2 C5 N1 112.9(3) . . ?

N2 C5 C14 112.6(3) . . ?

N1 C5 C14 112.4(3) . . ?

N2 C5 H5A 106.1 . . ?

N1 C5 H5A 106.1 . . ?

C14 C5 H5A 106.1 . . ?

N3 C3 P1 110.9(2) . . ?

N3 C3 H3A 109.5 . . ?

P1 C3 H3A 109.5 . . ?

N3 C3 H3B 109.5 . . ?

P1 C3 H3B 109.5 . . ?

H3A C3 H3B 108.0 . . ?

C18 C19 C14 120.7(3) . . ?

C18 C19 H19A 119.6 . . ?

C14 C19 H19A 119.6 . . ?

N1 C4 N3 113.3(3) . . ?

N1 C4 C7 112.7(3) . . ?

N3 C4 C7 112.9(3) . . ?

N1 C4 H4A 105.7 . . ?

N3 C4 H4A 105.7 . . ?

C7 C4 H4A 105.7 . . ?

C11 C12 C7 121.6(3) . . ?

C11 C12 H12A 119.2 . . ?

C7 C12 H12A 119.2 . . ?

O3 C24 C25 125.1(3) . . ?

O3 C24 C23 115.1(3) . . ?

C25 C24 C23 119.7(3) . . ?

C10 C11 C12 119.5(3) . . ?

C10 C11 H11A 120.3 . . ?

C12 C11 H11A 120.3 . . ?

C17 C16 C15 119.2(3) . . ?

C17 C16 H16A 120.4 . . ?

C15 C16 H16A 120.4 . . ?

C23 C22 C21 120.6(3) . . ?

C23 C22 H22A 119.7 . . ?

C21 C22 H22A 119.7 . . ?

N3 C6 N2 114.0(3) . . ?

N3 C6 C21 111.8(3) . . ?

N2 C6 C21 111.5(3) . . ?

N3 C6 H6A 106.3 . . ?

N2 C6 H6A 106.3 . . ?

C21 C6 H6A 106.3 . . ?

C9 C8 C7 121.1(3) . . ?

C9 C8 H8A 119.4 . . ?

C7 C8 H8A 119.4 . . ?

C16 C17 O2 124.0(3) . . ?

C16 C17 C18 119.9(3) . . ?

O2 C17 C18 116.1(3) . . ?

C8 C7 C12 117.6(3) . . ?

C8 C7 C4 122.2(3) . . ?

C12 C7 C4 119.9(3) . . ?

N2 C2 P1 110.6(2) . . ?

N2 C2 H2A 109.5 . . ?

P1 C2 H2A 109.5 . . ?

N2 C2 H2B 109.5 . . ?

P1 C2 H2B 109.5 . . ?

H2A C2 H2B 108.1 . . ?

C24 C25 C26 119.8(3) . . ?

C24 C25 H25A 120.1 . . ?

C26 C25 H25A 120.1 . . ?

C8 C9 C10 120.6(3) . . ?

C8 C9 H9A 119.7 . . ?

C10 C9 H9A 119.7 . . ?

C22 C23 C24 120.1(3) . . ?

C22 C23 H23A 120.0 . . ?

C24 C23 H23A 120.0 . . ?

C21 C26 C25 121.3(3) . . ?

C21 C26 H26A 119.4 . . ?

C25 C26 H26A 119.4 . . ?

C14 C15 C16 121.7(3) . . ?

C14 C15 H15A 119.2 . . ?

C16 C15 H15A 119.2 . . ?

O1 C13 H13A 109.5 . . ?

O1 C13 H13B 109.5 . . ?

H13A C13 H13B 109.5 . . ?

O1 C13 H13C 109.5 . . ?

H13A C13 H13C 109.5 . . ?

H13B C13 H13C 109.5 . . ?

O2 C20 H20A 109.5 . . ?

O2 C20 H20B 109.5 . . ?

H20A C20 H20B 109.5 . . ?

O2 C20 H20C 109.5 . . ?

H20A C20 H20C 109.5 . . ?

H20B C20 H20C 109.5 . . ?

O3 C27 H27A 109.5 . . ?

O3 C27 H27B 109.5 . . ?

H27A C27 H27B 109.5 . . ?

O3 C27 H27C 109.5 . . ?

H27A C27 H27C 109.5 . . ?

H27B C27 H27C 109.5 . . ?

Cl1S C1S Cl2S 110.6(2) . . ?

Cl1S C1S H1SA 109.5 . . ?

Cl2S C1S H1SA 109.5 . . ?

Cl1S C1S H1SB 109.5 . . ?

Cl2S C1S H1SB 109.5 . . ?

H1SA C1S H1SB 108.1 . . ?

 

loop_

 _geom_torsion_atom_site_label_1

 _geom_torsion_atom_site_label_2

 _geom_torsion_atom_site_label_3

 _geom_torsion_atom_site_label_4

 _geom_torsion

 _geom_torsion_site_symmetry_1

 _geom_torsion_site_symmetry_2

 _geom_torsion_site_symmetry_3

 _geom_torsion_site_symmetry_4

 _geom_torsion_publ_flag

P1 Pd1 P1 C3 174(100) 3_666 . . . ?

Cl1 Pd1 P1 C3 53.37(13) . . . . ?

Cl1 Pd1 P1 C3 -126.63(13) 3_666 . . . ?

P1 Pd1 P1 C1 59(100) 3_666 . . . ?

Cl1 Pd1 P1 C1 -62.51(13) . . . . ?

Cl1 Pd1 P1 C1 117.49(13) 3_666 . . . ?

P1 Pd1 P1 C2 -61(100) 3_666 . . . ?

Cl1 Pd1 P1 C2 178.19(13) . . . . ?

Cl1 Pd1 P1 C2 -1.81(13) 3_666 . . . ?

C4 N1 C1 P1 -61.4(3) . . . . ?

C5 N1 C1 P1 59.1(3) . . . . ?

C3 P1 C1 N1 52.7(2) . . . . ?

C2 P1 C1 N1 -50.0(3) . . . . ?

Pd1 P1 C1 N1 179.67(18) . . . . ?

C13 O1 C10 C11 9.9(5) . . . . ?

C13 O1 C10 C9 -170.8(3) . . . . ?

C2 N2 C5 N1 66.3(4) . . . . ?

C6 N2 C5 N1 -56.2(3) . . . . ?

C2 N2 C5 C14 -62.3(3) . . . . ?

C6 N2 C5 C14 175.1(3) . . . . ?

C4 N1 C5 N2 59.6(3) . . . . ?

C1 N1 C5 N2 -64.2(3) . . . . ?

C4 N1 C5 C14 -171.6(3) . . . . ?

C1 N1 C5 C14 64.5(3) . . . . ?

C15 C14 C5 N2 144.7(3) . . . . ?

C19 C14 C5 N2 -39.0(4) . . . . ?

C15 C14 C5 N1 15.8(4) . . . . ?

C19 C14 C5 N1 -167.9(3) . . . . ?

C6 N3 C3 P1 -59.8(3) . . . . ?

C4 N3 C3 P1 61.4(3) . . . . ?

C1 P1 C3 N3 -52.2(2) . . . . ?

C2 P1 C3 N3 48.4(2) . . . . ?

Pd1 P1 C3 N3 -177.91(17) . . . . ?

C17 C18 C19 C14 -2.5(5) . . . . ?

C15 C14 C19 C18 -0.2(5) . . . . ?

C5 C14 C19 C18 -176.6(3) . . . . ?

C1 N1 C4 N3 63.6(3) . . . . ?

C5 N1 C4 N3 -60.6(3) . . . . ?

C1 N1 C4 C7 -66.2(3) . . . . ?

C5 N1 C4 C7 169.6(3) . . . . ?

C6 N3 C4 N1 57.7(3) . . . . ?

C3 N3 C4 N1 -64.1(3) . . . . ?

C6 N3 C4 C7 -172.6(3) . . . . ?

C3 N3 C4 C7 65.6(4) . . . . ?

C27 O3 C24 C25 -11.1(5) . . . . ?

C27 O3 C24 C23 170.0(3) . . . . ?

O1 C10 C11 C12 -178.9(3) . . . . ?

C9 C10 C11 C12 1.8(5) . . . . ?

C7 C12 C11 C10 -1.4(5) . . . . ?

C26 C21 C22 C23 1.4(5) . . . . ?

C6 C21 C22 C23 -172.0(3) . . . . ?

C3 N3 C6 N2 71.1(3) . . . . ?

C4 N3 C6 N2 -52.6(3) . . . . ?

C3 N3 C6 C21 -161.3(3) . . . . ?

C4 N3 C6 C21 75.0(3) . . . . ?

C2 N2 C6 N3 -71.6(3) . . . . ?

C5 N2 C6 N3 52.4(3) . . . . ?

C2 N2 C6 C21 160.7(3) . . . . ?

C5 N2 C6 C21 -75.3(3) . . . . ?

C26 C21 C6 N3 14.5(4) . . . . ?

C22 C21 C6 N3 -172.4(3) . . . . ?

C26 C21 C6 N2 143.4(3) . . . . ?

C22 C21 C6 N2 -43.5(4) . . . . ?

C15 C16 C17 O2 179.3(3) . . . . ?

C15 C16 C17 C18 -0.5(5) . . . . ?

C20 O2 C17 C16 8.1(5) . . . . ?

C20 O2 C17 C18 -172.1(3) . . . . ?

C19 C18 C17 C16 2.9(5) . . . . ?

C19 C18 C17 O2 -177.0(3) . . . . ?

C9 C8 C7 C12 1.5(5) . . . . ?

C9 C8 C7 C4 176.0(3) . . . . ?

C11 C12 C7 C8 -0.2(5) . . . . ?

C11 C12 C7 C4 -174.9(3) . . . . ?

N1 C4 C7 C8 154.4(3) . . . . ?

N3 C4 C7 C8 24.4(4) . . . . ?

N1 C4 C7 C12 -31.2(4) . . . . ?

N3 C4 C7 C12 -161.2(3) . . . . ?

C5 N2 C2 P1 -62.3(3) . . . . ?

C6 N2 C2 P1 59.9(3) . . . . ?

C3 P1 C2 N2 -48.4(3) . . . . ?

C1 P1 C2 N2 51.2(2) . . . . ?

Pd1 P1 C2 N2 179.07(17) . . . . ?

O3 C24 C25 C26 -179.6(3) . . . . ?

C23 C24 C25 C26 -0.8(5) . . . . ?

C7 C8 C9 C10 -1.1(6) . . . . ?

O1 C10 C9 C8 -179.9(3) . . . . ?

C11 C10 C9 C8 -0.6(5) . . . . ?

C21 C22 C23 C24 -3.1(5) . . . . ?

O3 C24 C23 C22 -178.3(3) . . . . ?

C25 C24 C23 C22 2.7(5) . . . . ?

C22 C21 C26 C25 0.6(5) . . . . ?

C6 C21 C26 C25 173.7(3) . . . . ?

C24 C25 C26 C21 -0.9(5) . . . . ?

C19 C14 C15 C16 2.6(5) . . . . ?

C5 C14 C15 C16 178.9(3) . . . . ?

C17 C16 C15 C14 -2.2(5) . . . . ?

 

_diffrn_measured_fraction_theta_max    0.999

_diffrn_reflns_theta_full              27.50

_diffrn_measured_fraction_theta_full   0.999

_refine_diff_density_max    1.062

_refine_diff_density_min   -1.107

_refine_diff_density_rms    0.106
